# Supplementary material
Source: PubMed Central journal article supplement (PMC3412352)

Supplemental figure 1

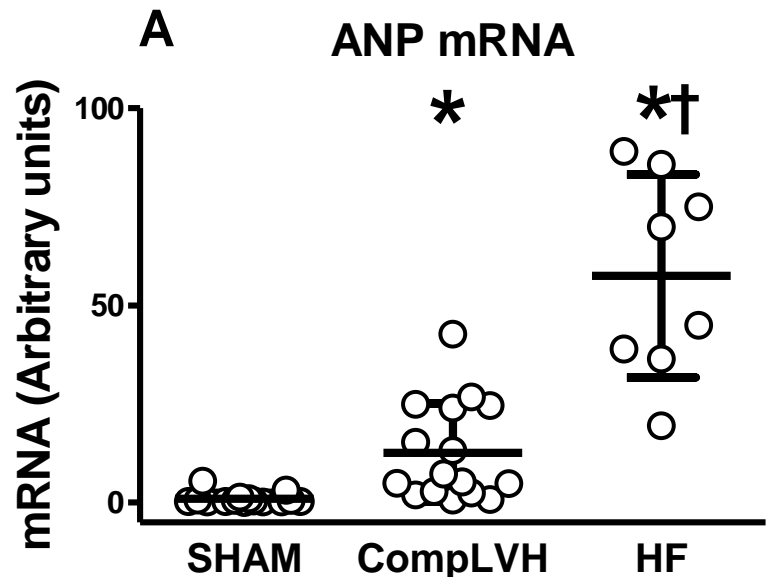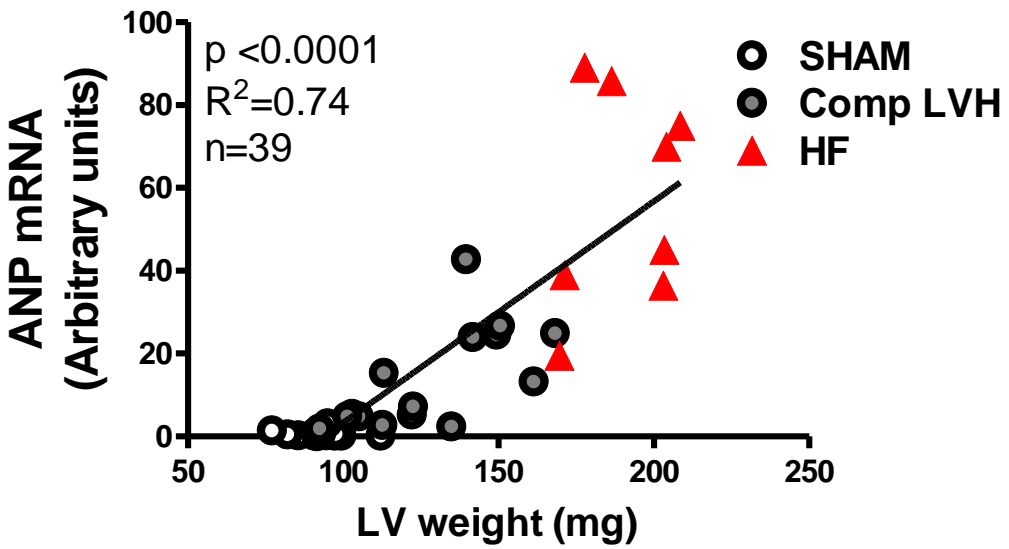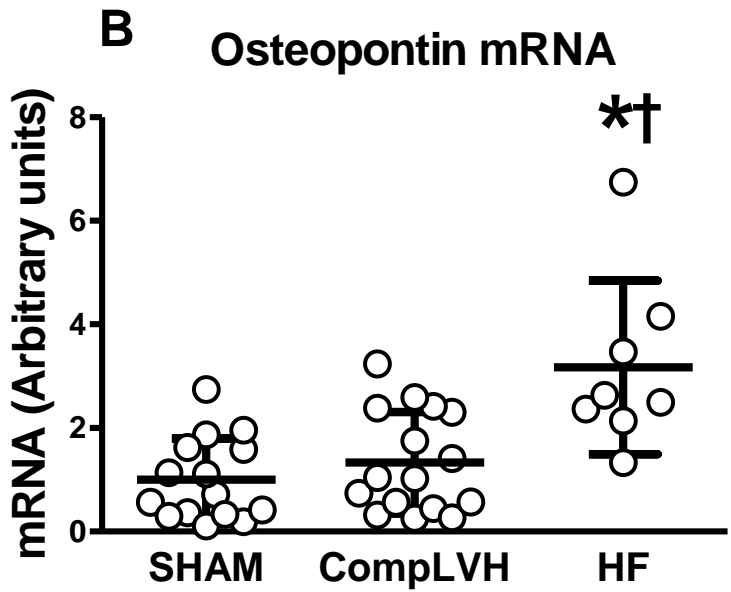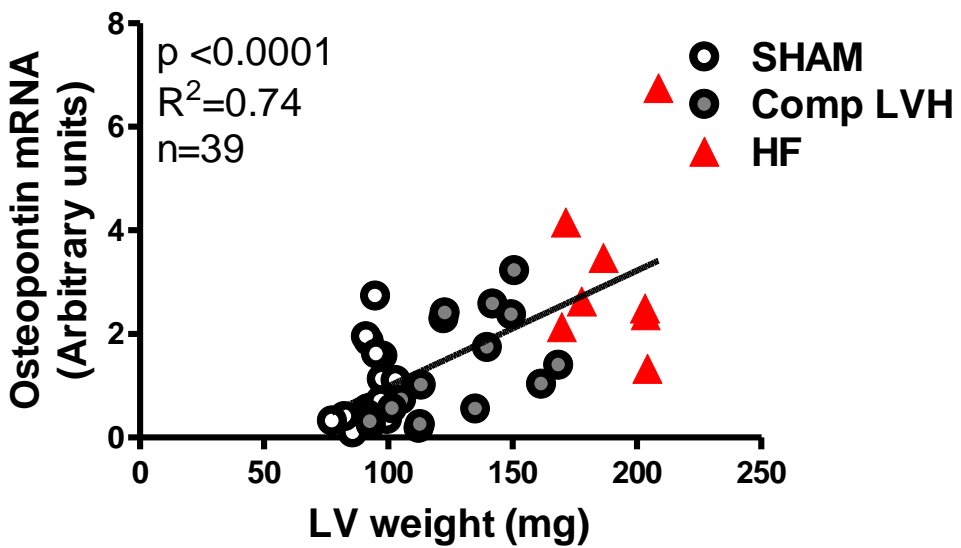

Supplement: NIHMS299497-supplement-01.pdf [file NIHMS299497-supplement-01.pdf]
